# Supplementary material
Source: publisher figshare collection journal article supplement (https://gsajournals.figshare.com/ndownloader/files/24788237)
Supplement: Supplementary file 1 [file 24788237]

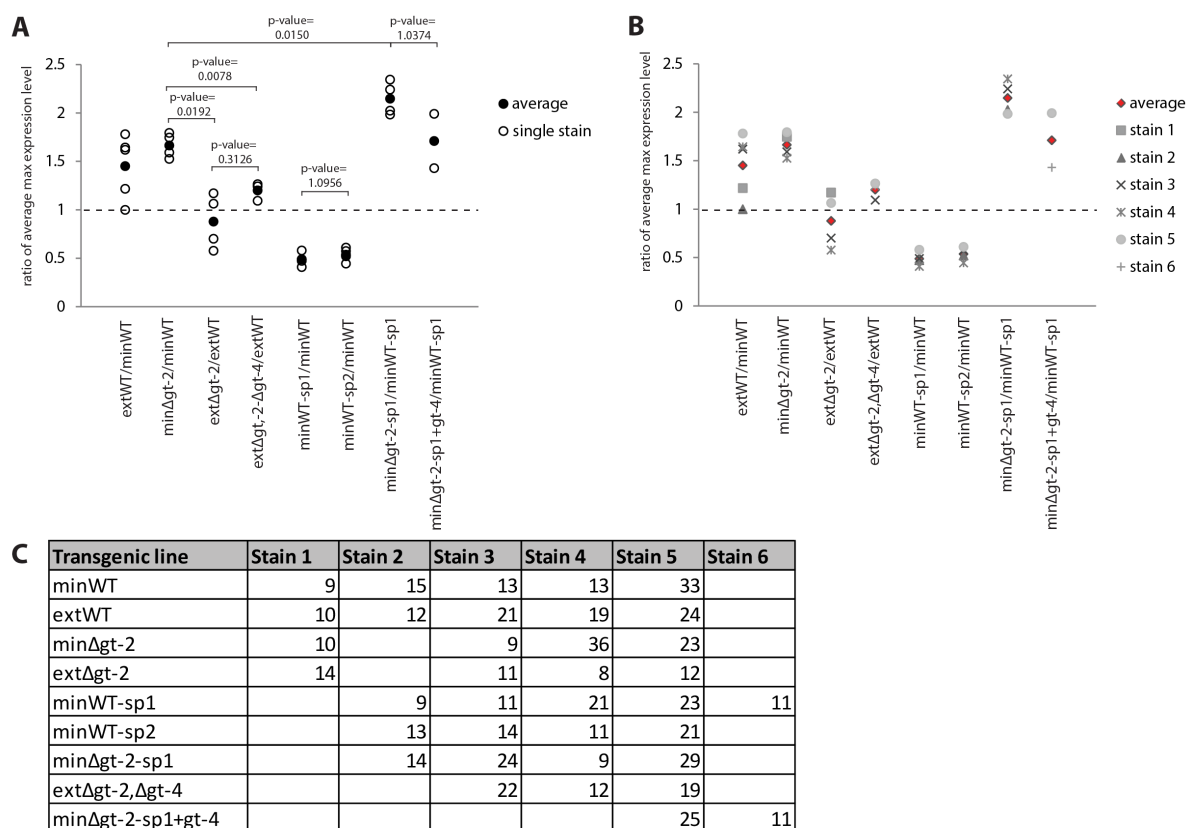

**Figure S3: Complete expression level data for Figures 1-3.** (A) The peak *lacZ* level ratios presented throughout the study have been plotted together. A ratio of 1 has been indicated with a dashed line. The p-values resulting from one-sided, two-sample t-tests with unequal variances between different peak *lacZ* level ratios, corrected with the Bonferroni adjustment (p-value from each t-test multiplied by total number of comparisons in the plot, 6), have been included on top of the data points. (B) The same ratios as in A were plotted with each stain labelled with a unique symbol. The average ratio for all stains has been included as a red diamond. (C) The number of embryos from each transgenic line included in the plots with the peak *lacZ* level ratios has been sorted per stain.
